# Supplementary material
Source: publisher site journal article supplement (https://www.degruyterbrill.com/publication/isbn/9783805911764/downloadAsset/9783805911764_Inhaltsverzeichnis.pdf)
Supplement: Supplementary file 1 [file 9783805911764_Inhaltsverzeichnis.pdf]

# Inhaltsübersicht

|                                                                                        | Seite <sup>*</sup> |
|----------------------------------------------------------------------------------------|--------------------|
| Buch 3 · Sachenrecht                                                                   |                    |
| Abschnitt 8 · Pfandrecht an beweglichen Sachen und an Rechten                          |                    |
| Titel 1 · Pfandrecht an beweglichen Sachen _____                                       | 1                  |
| Titel 2 · Pfandrecht an Rechten _____                                                  | 261                |
| Gesetz über Rechte an eingetragenen Schiffen und Schiffsbauwerken<br>(SchiffsRG) _____ | 367                |
| Sachregister _____                                                                     | 481                |

---

<sup>\*</sup> Zitiert wird nicht nach Seiten, sondern nach Paragraph bzw Artikel und Randnummer; siehe dazu auch „Zitierweise“.
